1 Probiotics for the prevention of antibiotic-associated adverse  
2 events in children – a systematic review to inform  
3 development of a core outcome set  
4

5 Jan Łukasik<sup>1\*</sup>, Qin Guo<sup>2</sup>, Leah Boulos<sup>3</sup>, Hania Szajewska<sup>1</sup>, Bradley C. Johnston<sup>4</sup>

6

7 <sup>1</sup>Medical University of Warsaw, Department of Pediatrics, Warsaw, Poland

8 <sup>2</sup>West China Second University Hospital, Department of Pediatrics, Chengdu, China,

9 <sup>3</sup>Maritime SPOR SUPPORT Unit, Halifax, Canada

10 <sup>4</sup>Dalhousie University, Department of Community Health and Epidemiology, Halifax, Canada

11

12 \*Corresponding author

13 E-mail: [jan.lukasik@wum.edu.pl](mailto:jan.lukasik@wum.edu.pl) (JL)

## 14 **Abstract**

15

16 **Introduction:** Routine use of probiotics during antibiotic therapy in children remains a  
17 subject of discussion. To facilitate synthesis of individual study results and guideline  
18 formulation, it is important to assess predefined, similar, and clinically important outcomes.  
19 Core outcome sets are a proposed solution for this issue. Aim of this review was to document  
20 choice, design, and heterogeneity of outcomes in studies that assessed the effects of probiotics  
21 used for the prevention of antibiotic-associated adverse events in children. **Methods:** A  
22 systematic literature search covering three major databases was performed. Trials that evaluated  
23 oral probiotics' use concomitant with antibiotic therapy in children were included. Data on  
24 outcome definitions, measurement instruments, and follow-up were extracted. The outcomes  
25 were assigned to predefined core areas and domains. Data were analyzed descriptively. **Results:**  
26 Thirty-six trials were included in this review. Diarrhea, the most commonly reported outcome,  
27 had diagnostic criteria clearly defined only in 20 trials. In total, sixteen different definitions of  
28 diarrhea were identified. Diarrhea duration, severity and etiology were reported in 8, 4 and 6  
29 studies, respectively. Nineteen studies assessed gastrointestinal symptoms other than diarrhea.  
30 Seven studies reported outcomes related to resource use or the economic impact of the  
31 intervention. Only 2 studies assessed outcomes related to life impact. None of the studies  
32 predefined adverse events of probiotic use. **Conclusions:** Identified outcomes were  
33 characterized by substantial heterogeneity. Majority of outcomes were not designed to evaluate  
34 endpoints of real-life relevance. Results from this review suggest the need for a new core  
35 outcome set consisting of outcomes important for decision-making.

## 36 **Introduction**

37           The human gastrointestinal tract is colonized by hundreds of different microorganisms,  
38 which together form the gut microbiota (1, 2). Use of antibiotics is one of the factors known to  
39 alter the microbiota composition, which in turn may have an effect on an individual's health.  
40 Typical adverse events associated with antibiotic use include various gastrointestinal symptoms  
41 such as diarrhea, nausea, vomiting, and abdominal pain (3). Among them, antibiotic-associated  
42 diarrhea (AAD), often defined as 'diarrhea that occurs in relation to antibiotic treatment with  
43 the exclusion of other etiologies' (4), is the best documented.

44           Over 30 randomized controlled trials (RCTs), mostly with probiotics as an intervention,  
45 have been performed to assess the prophylactic strategies for AAD in children (5). In the largest  
46 observational study of 650 children published in 2003, the estimated AAD incidence in the  
47 pediatric outpatient population was 11% (6). On the other hand, in a recent (2019) Cochrane  
48 review (5), the incidence of AAD varied greatly from study to study, ranging from 2% (7) to  
49 80% (8). In addition to estimates sometimes being derived from very small underpowered  
50 studies (8-11), one of the factors responsible for this heterogeneity in reported incidences could  
51 be the definition of AAD adopted by authors of different RCTs and the methods used for  
52 measurement of this outcome. Among others, AAD diagnostic criteria vary between the studies  
53 in the terms of stool frequency, time from the start of antibiotic therapy, and microbiological  
54 methods, if any, used to exclude other etiologies of diarrhea.

55           Other potential effects of early-life microbiota alterations include later-life  
56 consequences such as obesity (12), allergies (13), autoimmune disorders (14), and  
57 neurodevelopmental abnormalities (15). The long-term health impact of probiotics and  
58 antibiotics administered during infancy has been evaluated in some RCTs (16, 17), but this  
59 outcome is not a part of a routine trial design.

60           According to the 2016 European Society for Pediatric Gastroenterology, Hepatology,  
61 and Nutrition (ESPGHAN) guidelines, some probiotic strains may be effective in AAD  
62 prevention (4). Consistent with this, a 2019 Cochrane systematic review of 33 studies concluded  
63 that there is a moderate protective effect of probiotics for preventing AAD (5). Still, this use of  
64 probiotics is the subject of a lasting discussion due to their cost, and the fact that AAD is usually  
65 a mild and self-limiting disease (18). To draw practical conclusions from RCTs, it is important  
66 to assess AAD severity and its impact on the patient's everyday life, including global  
67 assessment and health-related quality of life, with agreed-upon definitions and outcomes.  
68 However, a 2010 systematic review of outcomes used in trials of pediatric acute diarrhea  
69 revealed substantial heterogeneity in both the definitions of and the measurement methods for  
70 diarrhea (19). Similarly, in the 2019 Cochrane systematic review, the criteria for defining the  
71 incidence of diarrhea according to each primary investigator's definition varied widely among  
72 the studies (5). Differences in reported definitions, outcomes, and their measurement methods  
73 between studies may lead to difficulties in synthesizing results and hinder the process of  
74 guideline formulation. Standard definitions for main outcomes are a possible solution to these  
75 issues, and systematic reviews addressing the choice of outcomes in already performed studies  
76 are one of the first steps in the process of designing a core outcome set (COS) (20). In 2016, a  
77 document by the Consensus Group on Outcome Measures Made in Pediatric Enteral Nutrition  
78 Clinical Trials (COMMENT) was published, proposing core outcomes for future use in RCTs  
79 evaluating therapeutic and preventive strategies for acute gastroenteritis (21). However, authors  
80 of this document did not include any statements regarding outcomes specific for AAD. Also,  
81 no core outcome set to date has been proposed for use in trials in which probiotics are  
82 administered concurrently with antibiotic therapy.

83           Our primary aim was to systematically document the definitions of AAD, as well as all  
84 of the methods used to measure and describe this outcome, in studies that assessed the effect(s)

85 of probiotics used for AAD prevention. Additionally, we aimed to document any other  
86 outcomes reported in studies on probiotic use during antibiotic therapy, provided that they were  
87 used to examine probiotics' effect(s) in the prevention of antibiotic-associated adverse events.

88

## 89 **Methods**

### 90 **Inclusion/Exclusion Criteria for the Review**

91 Studies that evaluated oral probiotics' potential to prevent adverse events associated  
92 with antibiotic therapy were eligible for inclusion in this review. Eligible studies could be  
93 RCTs, non-randomized trials (NRTs), or observational studies (e.g., cohort studies, case-  
94 control studies) and had to be conducted in a population of children up to 18 years of age.  
95 Among the studies conducted in mixed populations of children and adults, only those that  
96 reported separate data for a subgroup of children were included. Furthermore, only studies  
97 published in English were included.

98 Studies that reported only laboratory outcomes (e.g., only stool microbiota composition)  
99 were not included in this review. Since the main focus of this review was the prevention of  
100 AAD, studies on probiotics used concurrently with antibiotics in the treatment of *Clostridium*  
101 *difficile*-associated diarrhea or other types of diarrhea were excluded. Additionally, studies  
102 conducted exclusively in premature infants and in critically ill children hospitalized in intensive  
103 care units were also not included, because the characteristics of these populations and the goals  
104 of probiotic use differ greatly from those in the general population.

105

### 106 **Search methods**

107 A systematic search was performed from inception to October 23, 2018 in three major  
108 databases (MEDLINE, Embase, and CENTRAL). The search strategy was developed by an

109 information specialist and included controlled vocabulary and keywords related to 'antibiotic'  
110 and 'probiotic' terms. The full search strategy for the MEDLINE database is available in S1  
111 Table. Additionally, references of relevant review articles were manually searched.

112

### 113 **Selection of studies**

114 JL screened the search results and identified abstracts of potentially eligible articles.  
115 After abstract screening, full articles were acquired and independently evaluated for eligibility  
116 by JL and QG. Any disagreements concerning eligibility were resolved by discussion between  
117 the authors, and if needed, with a senior researcher.

118

### 119 **Data extraction**

120 The data from the included studies were extracted using an abstraction form developed  
121 specifically for this review. Extracted data included standard characteristics of studies (author,  
122 publication year, country, study type and setting, age and number of participants, indication for  
123 antibiotic treatment, type of antibiotics, investigated probiotic, and type of control group) and  
124 data specific to the outcomes. Each identified outcome was assigned to one of 4 core areas:  
125 “life impact”, “resource use”, “pathophysiological manifestations” or “death”, in accordance  
126 with the OMERACT Filter 2.0 (22). Specific outcomes were also assigned to one of the  
127 predefined outcome domains included within the core areas. In case of identification of an  
128 outcome not falling into any of the predefined domains, a new domain was created. An  
129 explanation of the outcome-related taxonomy used in the article is presented in Table 1. The  
130 data extraction and assignment of the outcomes to the core areas and domains were done  
131 independently by JL and QG, and any differences in opinion were resolved by discussion. The  
132 data extracted for each identified outcome included: outcome name in accordance with the

133 terminology used in the original publication, outcome characteristics (e.g., incidence, duration,  
 134 severity, primary/secondary outcome), outcome definition, outcome measurement instruments,

| Term                | Definition                                                                                                                                                                                                                       | Examples                                                                                  |
|---------------------|----------------------------------------------------------------------------------------------------------------------------------------------------------------------------------------------------------------------------------|-------------------------------------------------------------------------------------------|
| Core area           | An aspect of health or a health condition that needs to be measured to appropriately assess the effects of a health intervention. Core Areas are broad concepts consisting of a number of more specific concepts called domains. | Pathophysiological manifestations, life impact, resource use/economic impact              |
| Outcome domain      | An aspect of the effect of illness, categorized within the core area, but still relatively broad.                                                                                                                                | Diarrhea, gastrointestinal symptoms, absenteeism, need for additional medical procedures. |
| Outcome             | Any identified result in a domain arising from exposure to a causal factor or a health intervention.                                                                                                                             | Diarrhea incidence, number of school absence days, need for intravenous rehydration.      |
| Outcome measurement | A tool chosen to assess the outcome.                                                                                                                                                                                             | Visual stool form scale, symptom questionnaire,                                           |

135 and follow-up. The outcome was considered as primary if either: 1) the authors of the original  
 136 study declared it as such, or 2) a sample size calculation was performed for this specific  
 137 outcome. The data for purely biochemical or microbiological outcomes (e.g., microbiota  
 138 composition) were not extracted, because their documentation and evaluation would require an  
 139 entirely different methodological approach.

140

|            |  |                                            |
|------------|--|--------------------------------------------|
| instrument |  | immunoassay tests for rotavirus detection. |
|------------|--|--------------------------------------------|

141 **Table 1. Definitions of the terminology used in the article, in accordance with OMERACT**  
142 **definitions<sup>22</sup>**

143

#### 144 **Assessment of risk of bias in the included studies**

145 Risk of bias (RoB) assessment is not a mandatory part of systematic reviews of  
146 outcomes (20); however, we decided to present it for informative purposes. The Cochrane  
147 Collaboration's Tool for Assessing Risk of Bias (23) was used for RCTs and non-randomized  
148 trials. Wherever possible, we present the RoB assessment derived from the recent Cochrane  
149 review (5). For the remaining studies, the RoB assessment was performed by JL.

150

#### 151 **Data analysis**

152 Data on the identified outcomes are presented in numbers and percentages and analysed  
153 descriptively. Since this review aims to document the methods of outcome measurement and  
154 reporting, no analysis of the treatment effects was performed.

155

## 156 **Results**

#### 157 **Search results and overall characteristics**

158 In total, we identified 4251 records by the database search and additional 369 records  
159 from the review articles' references. After exclusion of duplicates and title and abstract  
160 screening, full texts of 80 articles were assessed for eligibility. After full-text assessment, 36  
161 articles ultimately met the inclusion criteria for this review(7-11, 24-54). The flow diagram of



162 the study selection process is presented in Fig 1. Reasons for exclusion of the specific studies  
163 are presented in S2 Table.

#### 164 **Fig 1. Flow chart diagram**

165 Among the included studies, 32 (89%) were RCTs, and the remaining 4 were NRTs.  
166 The total number of participants was 5506, ranging from 18 to 653 children in individual trials.  
167 Ten trials were conducted in the inpatient setting, 14 in the outpatient setting, 5 in the mixed  
168 setting, and 1 in an unclear setting. Additionally, in 6 trials on *H. pylori* treatment, the setting  
169 was not clearly defined; however, we assumed it to be ‘probably outpatient’, as *H. pylori*  
170 eradication usually takes place at home. The most common indications for antibiotic therapy  
171 were *H. pylori* treatment (11 studies, 31%), various childhood infections (11 studies, 31%), and  
172 respiratory tract infections (7 studies, 19%). Various beta-lactams were most often used (31  
173 studies, 86%), followed by macrolides (22 studies, 61%). The majority of the trials (19 studies,  
174 53%) used single-strain probiotics as an intervention and were placebo-controlled (21 studies,  
175 58%). A summary of the included studies’ characteristics is presented in S3 Table. All of the  
176 identified outcomes and their characteristics are presented in Tables S4 & S5.

177 The RoB in the included trials varied. Most of the studies were characterized by  
178 substantial RoB. A summary of the RoB assessment is presented in S1 Fig.

#### 179 **Outcome domain: diarrhea**

180 The occurrence/incidence of diarrhea was reported as an outcome in 32 (89%) of the  
181 included studies and 20 (63%) of these studies reported it as a primary outcome. In only 20  
182 (63%) of these 32 studies were the criteria for diarrhea diagnosis clearly defined. In the  
183 remaining studies, the occurrence of diarrhea was reported by parents or patients during  
184 interviews or in study diaries, and diagnosed based on the participants’ or investigators’  
185 judgment, with unclear diagnostic criteria. In 9 (28%) of the studies which assessed this

186 outcome, various stool form scales were used, most commonly (7 studies) the Bristol Stool  
187 Form Scale (BSFS) (55).

188 Based on the frequency and minimal duration of loose stools occurrence, 8 different  
189 definitions of diarrhea were used by the authors of the original studies. Most commonly (11  
190 studies, 31%), diarrhea was diagnosed when at least 3 stools of abnormally loose consistency  
191 occurred during 48 hours. However, when different definitions of “abnormal stool consistency”  
192 were taken into an account, as many as 16 different definitions of diarrhea were identified. The  
193 most commonly used definitions of diarrhea are presented in Fig 2.

194 **Fig 2. Most commonly used definitions of diarrhea.**

195 Surprisingly, among the 32 studies that reported data on diarrhea occurrence, the  
196 authors referred to their outcome as ‘antibiotic-associated diarrhea’ or ‘treatment-associated  
197 diarrhea’ in only 13 articles (39%). Among them, only 6 studies (19%) investigated a  
198 potentially infectious origin of diarrhea. Moreover, in 2 of them, the authors did not utilize this  
199 information to support or exclude a diagnosis of AAD (9, 29). Authors of the other 4 studies  
200 diagnosed AAD as “diarrhea caused by *C. difficile* or of otherwise unknown origin” and  
201 performed enzyme immunoassay tests for rota- and adenoviruses detection and stool cultures  
202 for bacterial pathogens (35, 37, 42, 45). A single study additionally tested for norovirus  
203 infection using enzyme immunoassay (35).

204 Included studies varied with respect to follow-up duration. In 21 (66%) of the 32 trials  
205 that assessed diarrhea as an outcome, the incidence of diarrhea was assessed during antibiotic  
206 treatment and an additional follow-up period, which varied from 1 week after the end of  
207 antibiotic therapy (32, 39) to up to 7 months after its beginning (36). Seven studies (22%)  
208 assessed diarrhea only during antibiotic treatment (28, 30, 31, 35, 50, 51, 54), and 3 studies  
209 (9%), only during the first 3 to 6 days of antibiotic therapy (27, 41, 43).

210           Among other characteristics of the diarrhea, its duration was reported in only 8 out of  
211 32 studies, which corresponds to 25% of the studies with diarrhea as an outcome. In 5 of these  
212 studies, the duration was not defined (8, 26, 27, 29, 51), whereas in each of the 3 remaining  
213 studies its definition varied (28, 31, 45). Diarrhea severity was reported as an outcome in only  
214 4 of the studies (13%), and it was defined differently in every one of them, usually on the basis  
215 of discharge frequency and stool consistency (7, 26, 28, 32). Diarrhea duration and severity  
216 were reported as co-primary outcomes in one study each (32, 45), while in the other studies  
217 they were either secondary or unspecified outcomes. Where provided, the definitions of  
218 diarrhea duration and severity can be found in S5 Table.

219           Other outcomes regarding diarrhea included occurrence of infectious diarrhea - 5 studies  
220 (26, 29, 35, 37, 42), stool consistency regardless of diarrhea occurrence - 5 studies (31, 38, 39,  
221 51, 52), bowel movement frequency - 3 studies (48, 51, 53), and time to diarrhea onset from  
222 the start of antibiotic therapy - 4 studies (8, 28, 29, 32). Additionally, the efficacy of diarrhea  
223 treatment, diarrhea-associated dehydration and time to first occurrence of loose stool were  
224 reported in one study each (28, 29, 32).

#### 225 **Outcome domain: *Clostridium difficile* infection**

226           In 6 studies, patients were investigated for the *Clostridium difficile* infection. In 1 study,  
227 the tests for toxin A and B were performed regardless of whether or not diarrhea occurred (i.e.,  
228 asymptomatic carrier)(7), while in the other 5 they were performed only in case of diarrhea (26,  
229 35, 37, 42, 45). One study used both the immunoassay for *C. difficile* toxin A detection and  
230 stool culture (26), whereas the others utilized only the toxin A and B immunoassays.

#### 231 **Outcome domain: other gastrointestinal symptoms**

232           The most commonly reported gastrointestinal outcomes other than diarrhea included the  
233 following: abdominal pain (15 studies, 42%), vomiting (16 studies, 44%), nausea (11 studies,  
234 31%), lack of appetite (7 studies, 20%), constipation (9 studies, 26%), bloating (7 studies, 19%),

235 taste problems (5 studies, 14%), and flatulence (7 studies, 19%). Other less commonly assessed  
236 outcomes included belching, abdominal discomfort, symptoms included in the Gastrointestinal  
237 Symptom Rating Score (GSRS)(56) (heartburn, acid regurgitation, sucking sensations in the  
238 stomach, borborygmus, abdominal distension, eructation, passage of stools, loose stools, hard  
239 stool, urgent need for defecation and feeling of incomplete defecation), and undefined  
240 ‘gastrointestinal complications’.

241 In 2 studies, (7, 10), the GSRS was used to assess the gastrointestinal symptoms (56).  
242 Additionally, a visual analog scale for abdominal pain intensity was used in one study (51), and  
243 a 3-point GI symptom rating scale was used in another (44). In the remaining studies, the  
244 gastrointestinal symptoms were reported by parents and/or children during interviews or in  
245 study diaries.

#### 246 **Other outcomes from “pathophysiological manifestations” core area**

247 None of the included studies assessed long-term adverse events associated with  
248 antibiotic use. Among the included studies, 18 (50%) reported data on adverse events  
249 potentially associated with probiotic use. In none of those studies were the adverse events  
250 predefined by the authors.

#### 251 **Outcomes from other core areas**

252 Seven studies (19%) reported outcomes from the “resource use/economical impact”  
253 core area (27, 31, 35, 37, 42, 47, 48). The most common outcomes from this area were need for  
254 antibiotic discontinuation due to diarrhea (6 studies), need for intravenous rehydration (5  
255 studies), and need for hospitalization due to diarrhea (5 studies).

256 Only 2 studies assessed outcomes from “life impact” core area. A single study reported  
257 data on absence from school/day care, missed parental days at work, and overall health (38),  
258 and another study reported the data on duration of hospital stay (31).

259

## 260 **Discussion**

261           In this review of outcomes used in studies assessing probiotic prophylactic interventions  
262 during antibiotic therapy in children, 32 RCTs and 4 NRTs were included. The incidence  
263 (occurrence) of diarrhea was the most commonly reported outcome. However, diagnostic  
264 criteria for diarrhea were clearly defined in only 63% of the 32 studies reporting this outcome.  
265 The majority of those studies did not utilize a validated instrument to assess the construct of  
266 diarrhea, the combination of stool frequency and consistency, did not report data on diarrhea  
267 duration and/or severity, and did not perform any microbiological tests to rule out its infectious  
268 origin. Sixteen different definitions of diarrhea were identified ranging from 1 or more  
269 abnormally loose stools per day (49) to 3 abnormally loose or liquid stools per 48 hours (9, 26,  
270 29, 37, 42, 47, 48). The follow-up duration in the included studies also varied. Diarrhea duration  
271 and severity were often not reported, and their definitions, if provided, were different in each  
272 study. Less than half of the included studies reported data on other GI symptoms, such as  
273 abdominal pain or vomiting, and in most of them authors did not report use of any assessment  
274 instruments besides study diaries. Finally, studies rarely included outcomes from ‘pragmatic’  
275 core areas, i.e., ‘life impact’ and ‘resource use and economical impact’.

276           To our knowledge, this is the first systematic review documenting the outcome  
277 measurement and reporting methods used in studies on this particular subject. Its methodology  
278 adhered both to the Cochrane Collaboration’s guidelines for systematic reviews(23) and to the  
279 recommendations of COMET (Core Outcome Measures in Effectiveness Trials) Initiative(20).  
280 Authors of this review have previous experience in probiotic and AAD research as well as in  
281 the field of systematic reviews. The potential limitations of this review result from the  
282 possibility of not including all relevant studies, since the search was limited to the articles

283 published in English and only a basic search of the grey literature was performed (i.e., manual  
284 search within the article references). However, this review aims to document the outcomes and  
285 their definitions rather than the effectiveness of interventions. Not including all of the available  
286 studies is unlikely to influence the overall conclusions, particularly given our study team also  
287 has expertise in general pediatrics, including ongoing commitments to patient care. The other  
288 limitation of this review is lack of microbiota composition-related outcomes. The authors  
289 recognize microbiome analysis as an important element of studies on probiotics and antibiotics  
290 alike, however documentation and comparative assessment of the analysis methods requires a  
291 wholly different approach compared to clinical outcomes(57). Another important group of  
292 microbiological outcomes which is absent in this review is the antibiotic resistance(58), as none  
293 of the otherwise eligible studies reported this outcome.

294 Results of this review reveal substantial heterogeneity in the definitions of reported  
295 diarrhea-related outcomes. In 37% of the 32 included studies that reported the incidence of  
296 diarrhea as an outcome, the authors did not define criteria for diarrhea diagnosis, which  
297 increases the risk of reporting bias(59, 60). In the remaining studies, including the papers  
298 published subsequent to the core outcome set for use in clinical trials of pediatric acute  
299 diarrhea(21), multiple definitions of diarrhea were identified. The definitions of diarrhea  
300 duration and severity also varied. This heterogeneity may theoretically lead to difficulty in  
301 combining data from different studies for the purpose of meta-analysis(61). In the recent  
302 Cochrane review on pediatric AAD, substantial heterogeneity ( $I^2=57%$ ) was found in the  
303 analysis of diarrhea incidence (5). When subgroup analysis was based on only one definition  
304 of diarrhea (i.e., 3 or more loose/water/liquid stools per day for at least 2 consecutive days), the  
305 heterogeneity was significantly reduced ( $I^2 = 15%$ ). On the other hand, a test for interaction by  
306 diarrhea definition was not statistically significant, which suggests that different definitions of

307 diarrhea were not the main reason for the overall heterogeneity of the result in the  
308 aforementioned review(5).

309         The other finding of our review concerns the criteria for AAD diagnosis. Even though  
310 the included studies investigated symptoms related to antibiotic use, authors referred to their  
311 outcome as ‘antibiotic-associated diarrhea’ in only 39% of the articles that reported the  
312 incidence of diarrhea. Moreover, infectious origin of diarrhea was investigated by  
313 microbiological methods in only 6 (19%) of studies. Considering the fact that most of the  
314 studies’ participants were either inpatients or visited healthcare facilities at the beginning of  
315 trial, they were at risk of nosocomial diarrhea(62). Not ruling out the possibility of infectious  
316 gastroenteritis in this group of patients introduces a risk of outcome misclassification. Even in  
317 studies that utilized microbiological methods to identify diarrhea etiology, it is impossible to  
318 completely rule out its infectious origin, due to the limited diagnostic accuracy of enzyme  
319 immunoassay methods(63, 64). Diarrhea reported as an outcome in the few studies which  
320 performed the microbiological testing is much more likely to be an actual AAD.

321         The most commonly assessed outcome from the ‘diarrhea’ domain was incidence data.  
322 Surprisingly, other outcomes that are arguably more patient important, such as diarrhea duration  
323 or severity, were rarely reported. Furthermore, even the most anticipatory criterion for diarrhea  
324 diagnosis was ‘at least 3 loose or watery stools per day for at least 48 hours’. This constitutes a  
325 relatively mild course of illness, especially assuming that the symptoms are likely to resolve on  
326 the third day after occurrence(65). Based only on the data for diarrhea incidence, it is difficult  
327 to assess whether the reported effect of any intervention was of actual importance to the  
328 patients. Other GI outcomes that could contribute to drawing clinically significant conclusions  
329 such as abdominal pain or vomiting, were only assessed in a small portion of the studies, even  
330 though they are likely to occur during antibiotic treatment(3). When they were reported, authors  
331 typically assessed incidence rather than duration or severity, again focusing on outcomes they

332 may be less patient-important. Outcomes from ‘resource use’ and ‘life impact’ core areas,  
333 which reflect the pragmatic approach to clinical trial design, were rarely reported. The lack of  
334 available outcomes on life impact, particularly quality of life, is concerning. Although quality  
335 of life measures are not often an outcome employed in clinical trials assessing acute outcomes,  
336 there are examples in acute gastroenteritis(66). Although we did not find validated disease  
337 specific quality of life outcomes used in our target population, individualized quality of life  
338 instruments such as Measure Yourself Medical Outcome Profile (MYMOP) should be  
339 considered as a part of core outcomes(67).

340 The included studies also varied in the terms of follow-up duration with the majority of  
341 the studies following patients during the entire duration of antibiotic therapy and for at least  
342 one week after antibiotic cessation. Considering the usually short incubation time of AAD(68),  
343 these lengths of follow-up should be sufficient to identify most of the cases.

344 None of the included studies predefined outcomes from the domain ‘adverse events of  
345 the probiotic use’. This may result from the fact that the probiotics are unlikely to cause adverse  
346 events in immunocompetent children(69). Nevertheless, a clear and carefully planned  
347 documentation of adverse events is still important(70), as claims of harmful effects of probiotic  
348 use, particularly in immunocompromised patients, are being occasionally published (71).

349

## 350 **Conclusions**

351 Outcomes reported in studies on probiotic use in children receiving antibiotic therapy  
352 are characterized by substantial heterogeneity. In the majority of trials, the outcomes and  
353 outcome measures are not designed to evaluate outcomes of real-life relevance such as patient  
354 and parent reported quality of life. Results from this review suggest the need for a new core



355 outcome set with endpoints that cover the span of domains and outcomes important to patients,  
356 families and clinicians for decision-making.

357

358

## 359 **References**

- 360 1. Guarner F, Malagelada JR. Gut flora in health and disease. *Lancet* (London, England).  
361 2003;361(9356):512-9.
- 362 2. Hugon P, Dufour JC, Colson P, Fournier PE, Sallah K, Raoult D. A comprehensive repertoire  
363 of prokaryotic species identified in human beings. *Lancet Infect Dis*. 2015;15(10):1211-9.
- 364 3. Kramer MS, Hutchinson TA, Naimark L, Contardi R, Flegel KM, Leduc DG. Antibiotic-  
365 associated gastrointestinal symptoms in general pediatric outpatients. *Pediatrics*. 1985;76(3):365-70.
- 366 4. Szajewska H, Canani RB, Guarino A, Hojsak I, Indrio F, Kolacek S, et al. Probiotics for the  
367 Prevention of Antibiotic-Associated Diarrhea in Children. *J Pediatr Gastroenterol Nutr*.  
368 2016;62(3):495-506.
- 369 5. Guo Q, Goldenberg JZ, Humphrey C, El Dib R, Johnston BC. Probiotics for the prevention of  
370 pediatric antibiotic-associated diarrhea. *Cochrane Database of Systematic Reviews*. 2019(4).
- 371 6. Turck D, Bernet JP, Marx J, Kempf H, Giard P, Walbaum O, et al. Incidence and risk factors  
372 of oral antibiotic-associated diarrhea in an outpatient pediatric population. *Journal of pediatric*  
373 *gastroenterology and nutrition*. 2003;37(1):22-6.
- 374 7. Georgieva M, Pancheva R, Rasheva N, Usheva N, Ivanova L, Koleva K. Use of the probiotic  
375 *Lactobacillus reuteri* DSM 17938 in the prevention of antibiotic-associated infections in hospitalized  
376 bulgarian children: a randomized, controlled trial. *Journal of IMAB - annual proceeding (scientific*  
377 *papers)*. 2015;21(4):895-900.
- 378 8. Jirapinyo P, Densupsoontorn N, Thamonsiri N, Wongarn R. Prevention of antibiotic-  
379 associated diarrhea in infants by probiotics. *Journal of the Medical Association of Thailand =*  
380 *Chotmaihet thangphaet*. 2002;85 Suppl 2:S739-42.

- 381 9. Zakordonets L, Tolstanova G, Yankovskiy D, Dymant H, Kramarev S. Different regimes of  
382 multiprobiotic for prevention of immediate and delayed side effects of antibiotic therapy in children.  
383 Research journal of pharmaceutical, biological and chemical sciences. 2016;7(3):2194-201.
- 384 10. Lionetti E, Miniello VL, Castellaneta SP, Magista AM, de Canio A, Maurogiovanni G, et al.  
385 Lactobacillus reuteri therapy to reduce side-effects during anti-Helicobacter pylori treatment in  
386 children: a randomized placebo controlled trial. Alimentary pharmacology & therapeutics.  
387 2006;24(10):1461-8.
- 388 11. Okazaki T, Asahara T, Yamataka A, Ogasawara Y, Lane GJ, Nomoto K, et al. Intestinal  
389 Microbiota in Pediatric Surgical Cases Administered Bifidobacterium Breve: a Randomized  
390 Controlled Trial. Journal of pediatric gastroenterology and nutrition. 2016;63(1):46-50.
- 391 12. Rasmussen SH, Shrestha S, Bjerregaard LG, Angquist LH, Baker JL, Jess T, et al. Antibiotic  
392 exposure in early life and childhood overweight and obesity: A systematic review and meta-analysis.  
393 Diabetes, obesity & metabolism. 2018;20(6):1508-14.
- 394 13. Kim DH, Han K, Kim SW. Effects of Antibiotics on the Development of Asthma and Other  
395 Allergic Diseases in Children and Adolescents. Allergy, asthma & immunology research.  
396 2018;10(5):457-65.
- 397 14. Kemppainen KM, Vehik K, Lynch KF, Larsson HE, Canepa RJ, Simell V, et al. Association  
398 Between Early-Life Antibiotic Use and the Risk of Islet or Celiac Disease Autoimmunity. JAMA  
399 pediatrics. 2017;171(12):1217-25.
- 400 15. Atladottir HO, Henriksen TB, Schendel DE, Parner ET. Autism after infection, febrile  
401 episodes, and antibiotic use during pregnancy: an exploratory study. Pediatrics. 2012;130(6):e1447-54.
- 402 16. Lundelin K, Poussa T, Salminen S, Isolauri E. Long-term safety and efficacy of perinatal  
403 probiotic intervention: Evidence from a follow-up study of four randomized, double-blind, placebo-  
404 controlled trials. Pediatric allergy and immunology : official publication of the European Society of  
405 Pediatric Allergy and Immunology. 2017;28(2):170-5.
- 406 17. Edmonson MB, Eickhoff JC. Weight Gain and Obesity in Infants and Young Children  
407 Exposed to Prolonged Antibiotic Prophylaxis. JAMA pediatrics. 2017;171(2):150-6.

- 408 18. Hojsak I. Probiotics in Children: What Is the Evidence? *Pediatric gastroenterology, hepatology*  
409 & nutrition. 2017;20(3):139-46.
- 410 19. Johnston BC, Shamseer L, da Costa BR, Tsuyuki RT, Vohra S. Measurement issues in trials of  
411 pediatric acute diarrheal diseases: a systematic review. *Pediatrics*. 2010;126(1):e222-31.
- 412 20. Williamson PR, Altman DG, Bagley H, Barnes KL, Blazeby JM, Brookes ST, et al. The  
413 COMET Handbook: version 1.0. *Trials*. 2017;18(Suppl 3):280.
- 414 21. Karas J, Ashkenazi S, Guarino A, Lo Vecchio A, Shamir R, Vandenplas Y, et al. Developing a  
415 core outcome measurement set for clinical trials in acute diarrhoea. *Acta paediatrica (Oslo, Norway :  
416 1992)*. 2016;105(4):e176-80.
- 417 22. Boers M, Kirwan JR, Wells G, Beaton D, Gossec L, d'Agostino M-A, et al. Developing Core  
418 Outcome Measurement Sets for Clinical Trials: OMERACT Filter 2.0. *Journal of Clinical  
419 Epidemiology*. 2014;67(7):745-53.
- 420 23. Higgins JPT, Green S. *Cochrane Handbook for Systematic Reviews of Interventions*: Wiley;  
421 2011.
- 422 24. Ahmad K, Fatemeh F, Mehri N, Maryam S. Probiotics for the treatment of pediatric  
423 helicobacter pylori infection: a randomized double blind clinical trial. *Iranian journal of pediatrics*.  
424 2013;23(1):79-84.
- 425 25. Akcam M, Koca T, Salman H, Karahan N. The effects of probiotics on treatment of  
426 *Helicobacter pylori* eradication in children. *Saudi medical journal*. 2015;36(3):286-90.
- 427 26. Arvola T, Laiho K, Torkkeli S, Mykkanen H, Salminen S, Maunula L, et al. Prophylactic  
428 *Lactobacillus GG* reduces antibiotic-associated diarrhea in children with respiratory infections: a  
429 randomized study. *Pediatrics*. 1999;104(5):e64.
- 430 27. Basnet S, Gauchan E, Adhikari S, Sathian B. Probiotics in the prevention of antibiotic  
431 associated diarrhoea in a tertiary teaching hospital in pokhara: A prospective study. *Journal of Clinical  
432 and Diagnostic Research*. 2017;11(10):SC11-SC3.
- 433 28. Bin Z, Ya-Zheng X, Zhao-Hui D, Bo C, Li-Rong J, Vandenplas Y. The Efficacy of  
434 *Saccharomyces boulardii* CNCM I-745 in Addition to Standard *Helicobacter pylori* Eradication  
435 Treatment in Children. *Pediatric gastroenterology, hepatology & nutrition*. 2015;18(1):17-22.

- 436 29. Corrêa NB, Péret Filho LA, Penna FJ, Lima FM, Nicoli JR. A randomized formula controlled  
437 trial of *Bifidobacterium lactis* and *Streptococcus thermophilus* for prevention of antibiotic-associated  
438 diarrhea in infants. *Journal of clinical gastroenterology*. 2005;39(5):385-9.
- 439 30. Erdeve O, Tiras U, Dallar Y. The probiotic effect of *Saccharomyces boulardii* in a pediatric  
440 age group. *Journal of tropical pediatrics*. 2004;50(4):234-6.
- 441 31. Esposito C, Roberti A, Turra F, Cerulo M, Severino G, Settini A, et al. Frequency of  
442 Antibiotic-Associated Diarrhea and Related Complications in Pediatric Patients Who Underwent  
443 Hypospadias Repair: a Comparative Study Using Probiotics vs Placebo. *Probiotics and antimicrobial*  
444 *proteins*. 2018;10(2):323-8.
- 445 32. Fox MJ, Ahuja KD, Robertson IK, Ball MJ, Eri RD. Can probiotic yogurt prevent diarrhoea in  
446 children on antibiotics? A double-blind, randomised, placebo-controlled study. *BMJ open*.  
447 2015;5(1):e006474.
- 448 33. Hurduc V, Plesca D, Dragomir D, Sajin M, Vandenplas Y. A randomized, open trial  
449 evaluating the effect of *Saccharomyces boulardii* on the eradication rate of *Helicobacter pylori*  
450 infection in children. *Acta paediatrica (Oslo, Norway : 1992)*. 2009;98(1):127-31.
- 451 34. Jindal M, Goyal Y, Lata S, Sharma RK. Preventive role of probiotic in antibiotic associated  
452 diarrhoea in children. *Indian Journal of Public Health Research and Development*. 2017;8(3):66-9.
- 453 35. Kolodziej M, Szajewska H. *Lactobacillus reuteri* DSM 17938 in the prevention of antibiotic-  
454 associated diarrhoea in children: a randomized clinical trial. *Clinical microbiology and infection : the*  
455 *official publication of the European Society of Clinical Microbiology and Infectious Diseases*. 2018.
- 456 36. Korpela K, Salonen A, Virta LJ, Kumpu M, Kekkonen RA, de Vos WM. *Lactobacillus*  
457 *rhamnosus* GG Intake Modifies Preschool Children's Intestinal Microbiota, Alleviates Penicillin-  
458 Associated Changes, and Reduces Antibiotic Use. *PloS one*. 2016;11(4):e0154012.
- 459 37. Kotowska M, Albrecht P, Szajewska H. *Saccharomyces boulardii* in the prevention of  
460 antibiotic-associated diarrhoea in children: a randomized double-blind placebo-controlled trial.  
461 *Alimentary pharmacology & therapeutics*. 2005;21(5):583-90.

- 462 38. Merenstein DJ, Foster J, D'Amico F. A randomized clinical trial measuring the influence of  
463 kefir on antibiotic-associated diarrhea: the measuring the influence of Kefir (MILK) Study. Archives  
464 of pediatrics & adolescent medicine. 2009;163(8):750-4.
- 465 39. Olek A, Woynarowski M, Ahren IL, Kierkus J, Socha P, Larsson N, et al. Efficacy and Safety  
466 of *Lactobacillus plantarum* DSM 9843 (LP299V) in the Prevention of Antibiotic-Associated  
467 Gastrointestinal Symptoms in Children-Randomized, Double-Blind, Placebo-Controlled Study. The  
468 Journal of pediatrics. 2017;186:82-6.
- 469 40. Plewinska EM, Planeta-Malecka I, Bak-Romaniszyn L, Czkwanlanc E, Malecka-Panas E.  
470 Probiotics in the treatment of *Helicobacter pylori* infection in children. Gastroenterologia polska.  
471 2006;13(4):315-9.
- 472 41. Ranasinghe J, Gamlath G, Samitha S, Abeygunawardena A. Prophylactic use of yoghurt  
473 reduces antibiotic induced diarrhoea in children. Sri Lanka Journal of Child Health. 2008;36(2):53-6.
- 474 42. Ruszczyński M, Radzikowski A, Szajewska H. Clinical trial: effectiveness of *Lactobacillus*  
475 *rhamnosus* (strains E/N, Oxy and Pen) in the prevention of antibiotic-associated diarrhoea in children.  
476 Alimentary pharmacology & therapeutics. 2008;28(1):154-61.
- 477 43. Seki H, Shiohara M, Matsumura T, Miyagawa N, Tanaka M, Komiyama A, et al. Prevention  
478 of antibiotic-associated diarrhea in children by *Clostridium butyricum* MIYAIRI. *Pediatr Int*.  
479 2003;45(1):86-90.
- 480 44. Shahraki T, Shahraki M, Shahri ES, Mohammadi M. No significant impact of *Lactobacillus*  
481 *reuteri* on eradication of *Helicobacter pylori* in children (double-blind randomized clinical trial).  
482 Iranian red crescent medical journal. 2017;19(3) (no pagination).
- 483 45. Shan LS, Hou P, Wang ZJ, Liu FR, Chen N, Shu LH, et al. Prevention and treatment of  
484 diarrhoea with *Saccharomyces boulardii* in children with acute lower respiratory tract infections.  
485 Beneficial microbes. 2013;4(4):329-34.
- 486 46. Sykora J, Valeckova K, Amlerova J, Siala K, Dedek P, Watkins S, et al. Effects of a specially  
487 designed fermented milk product containing probiotic *Lactobacillus casei* DN-114 001 and the  
488 eradication of *H. pylori* in children: a prospective randomized double-blind study. Journal of clinical  
489 gastroenterology. 2005;39(8):692-8.

- 490 47. Szajewska H, Albrecht P, Topczewska-Cabanek A. Randomized, double-blind, placebo-  
491 controlled trial: effect of lactobacillus GG supplementation on Helicobacter pylori eradication rates  
492 and side effects during treatment in children. *Journal of pediatric gastroenterology and nutrition*.  
493 2009;48(4):431-6.
- 494 48. Szymanski H, Armanska M, Kowalska-Duplaga K, Szajewska H. Bifidobacterium longum  
495 PL03, Lactobacillus rhamnosus KL53A, and Lactobacillus plantarum PL02 in the prevention of  
496 antibiotic-associated diarrhea in children: a randomized controlled pilot trial. *Digestion*.  
497 2008;78(1):13-7.
- 498 49. Tankanow RM, Ross MB, Ertel IJ, Dickinson DG, McCormick LS, Garfinkel JF. A double-  
499 blind, placebo-controlled study of the efficacy of Lactinex in the prophylaxis of amoxicillin-induced  
500 diarrhea. *DICP : the annals of pharmacotherapy*. 1990;24(4):382-4.
- 501 50. Tolone S, Pellino V, Vitaliti G, Lanzafame A, Tolone C. Evaluation of Helicobacter Pylori  
502 eradication in pediatric patients by triple therapy plus lactoferrin and probiotics compared to triple  
503 therapy alone. *Italian journal of pediatrics*. 2012;38:63.
- 504 51. Vanderhoof JA, Whitney DB, Antonson DL, Hanner TL, Lupo JV, Young RJ. Lactobacillus  
505 GG in the prevention of antibiotic-associated diarrhea in children. *The Journal of pediatrics*.  
506 1999;135(5):564-8.
- 507 52. Wang YH, Huang Y. Effect of Lactobacillus acidophilus and Bifidobacterium bifidum  
508 supplementation to standard triple therapy on Helicobacter pylori eradication and dynamic changes in  
509 intestinal flora. *World journal of microbiology & biotechnology*. 2014;30(3):847-53.
- 510 53. Zoppi G, Cinquetti M, Benini A, Bonamini E, Bertazzoni E. Modulation of the intestinal  
511 ecosystem by probiotics and lactulose in children during treatment with ceftriaxone. *Current*  
512 *Therapeutic Research-clinical and Experimental - CURR THER RES*. 2001;62:418-35.
- 513 54. Dharani Sudha G, Nirmala P, Ramanathan R, Samuel V. Comparative study of efficacy and  
514 safety of azithromycin alone and in combination with probiotic in the treatment of impetigo in  
515 children. *International Journal of Current Pharmaceutical Research*. 2017;9(6):52-5.
- 516 55. Lewis SJ, Heaton KW. Stool form scale as a useful guide to intestinal transit time. *Scand J*  
517 *Gastroenterol*. 1997;32(9):920-4.

- 518 56. Svedlund J, Sjodin I, Dotevall G. GSRS--a clinical rating scale for gastrointestinal symptoms  
519 in patients with irritable bowel syndrome and peptic ulcer disease. *Dig Dis Sci.* 1988;33(2):129-34.
- 520 57. Knight R, Vrbnac A, Taylor BC, Aksenov A, Callewaert C, Debelius J, et al. Best practices  
521 for analysing microbiomes. *Nature reviews Microbiology.* 2018;16(7):410-22.
- 522 58. Zheng M, Zhang R, Tian X, Zhou X, Pan X, Wong A. Assessing the Risk of Probiotic Dietary  
523 Supplements in the Context of Antibiotic Resistance. *Front Microbiol.* 2017;8:908.
- 524 59. Chan AW, Hrobjartsson A, Haahr MT, Gotzsche PC, Altman DG. Empirical evidence for  
525 selective reporting of outcomes in randomized trials: comparison of protocols to published articles.  
526 *Jama.* 2004;291(20):2457-65.
- 527 60. Chan AW, Tetzlaff JM, Altman DG, Laupacis A, Gotzsche PC, Krleza-Jeric K, et al. SPIRIT  
528 2013 statement: defining standard protocol items for clinical trials. *Ann Intern Med.* 2013;158(3):200-  
529 7.
- 530 61. Williamson P, Altman D, Blazeby J, Clarke M, Gargon E. Driving up the quality and  
531 relevance of research through the use of agreed core outcomes. *Journal of health services research &*  
532 *policy.* 2012;17(1):1-2.
- 533 62. Hojsak I, Szajewska H, Canani RB, Guarino A, Indrio F, Kolacek S, et al. Probiotics for the  
534 Prevention of Nosocomial Diarrhea in Children. *J Pediatr Gastroenterol Nutr.* 2018;66(1):3-9.
- 535 63. Desselberger U. Rotaviruses. *Virus research.* 2014;190:75-96.
- 536 64. Robilotti E, Deresinski S, Pinsky BA. Norovirus. *Clin Microbiol Rev.* 2015;28(1):134-64.
- 537 65. Damrongmanee A, Ukarapol N. Incidence of antibiotic-associated diarrhea in a pediatric  
538 ambulatory care setting. *J Med Assoc Thai.* 2007;90(3):513-7.
- 539 66. Johnston BC, Donen R, Pooni A, Pond J, Xie F, Giglia L, et al. Conceptual framework for  
540 health-related quality of life assessment in acute gastroenteritis. *J Pediatr Gastroenterol Nutr.*  
541 2013;56(3):280-9.
- 542 67. Paterson C, Britten N. In pursuit of patient-centred outcomes: a qualitative evaluation of the  
543 'Measure Yourself Medical Outcome Profile'. *Journal of health services research & policy.*  
544 2000;5(1):27-36.

- 545 68. McFarland LV. Antibiotic-associated diarrhea: epidemiology, trends and treatment. Future  
546 Microbiol. 2008;3(5):563-78.
- 547 69. van den Nieuwboer M, Claassen E, Morelli L, Guarner F, Brummer RJ. Probiotic and  
548 synbiotic safety in infants under two years of age. *Benef Microbes*. 2014;5(1):45-60.
- 549 70. Ioannidis JP, Evans SJ, Gotzsche PC, O'Neill RT, Altman DG, Schulz K, et al. Better  
550 reporting of harms in randomized trials: an extension of the CONSORT statement. *Ann Intern Med*.  
551 2004;141(10):781-8.
- 552 71. Bafeta A, Koh M, Riveros C, Ravaud P. Harms Reporting in Randomized Controlled Trials of  
553 Interventions Aimed at Modifying Microbiota: A Systematic Review. *Ann Intern Med*.  
554 2018;169(4):240-7.



## **Supporting information**

**S1 Fig. Risk of bias summary for the included studies**

**S1 Table. MEDLINE Search Strategy (Ovid MEDLINE(R) and Epub Ahead of Print, In-Process & Other Non-Indexed Citations, Daily and Versions(R))**

**S2 Table. Excluded studies with reasons of exclusion**

**S3 Table. Characteristics of the included studies**

**S4 Table. Outcomes identified in the included studies.**

**S5 Table. Characteristics of the identified outcomes.**

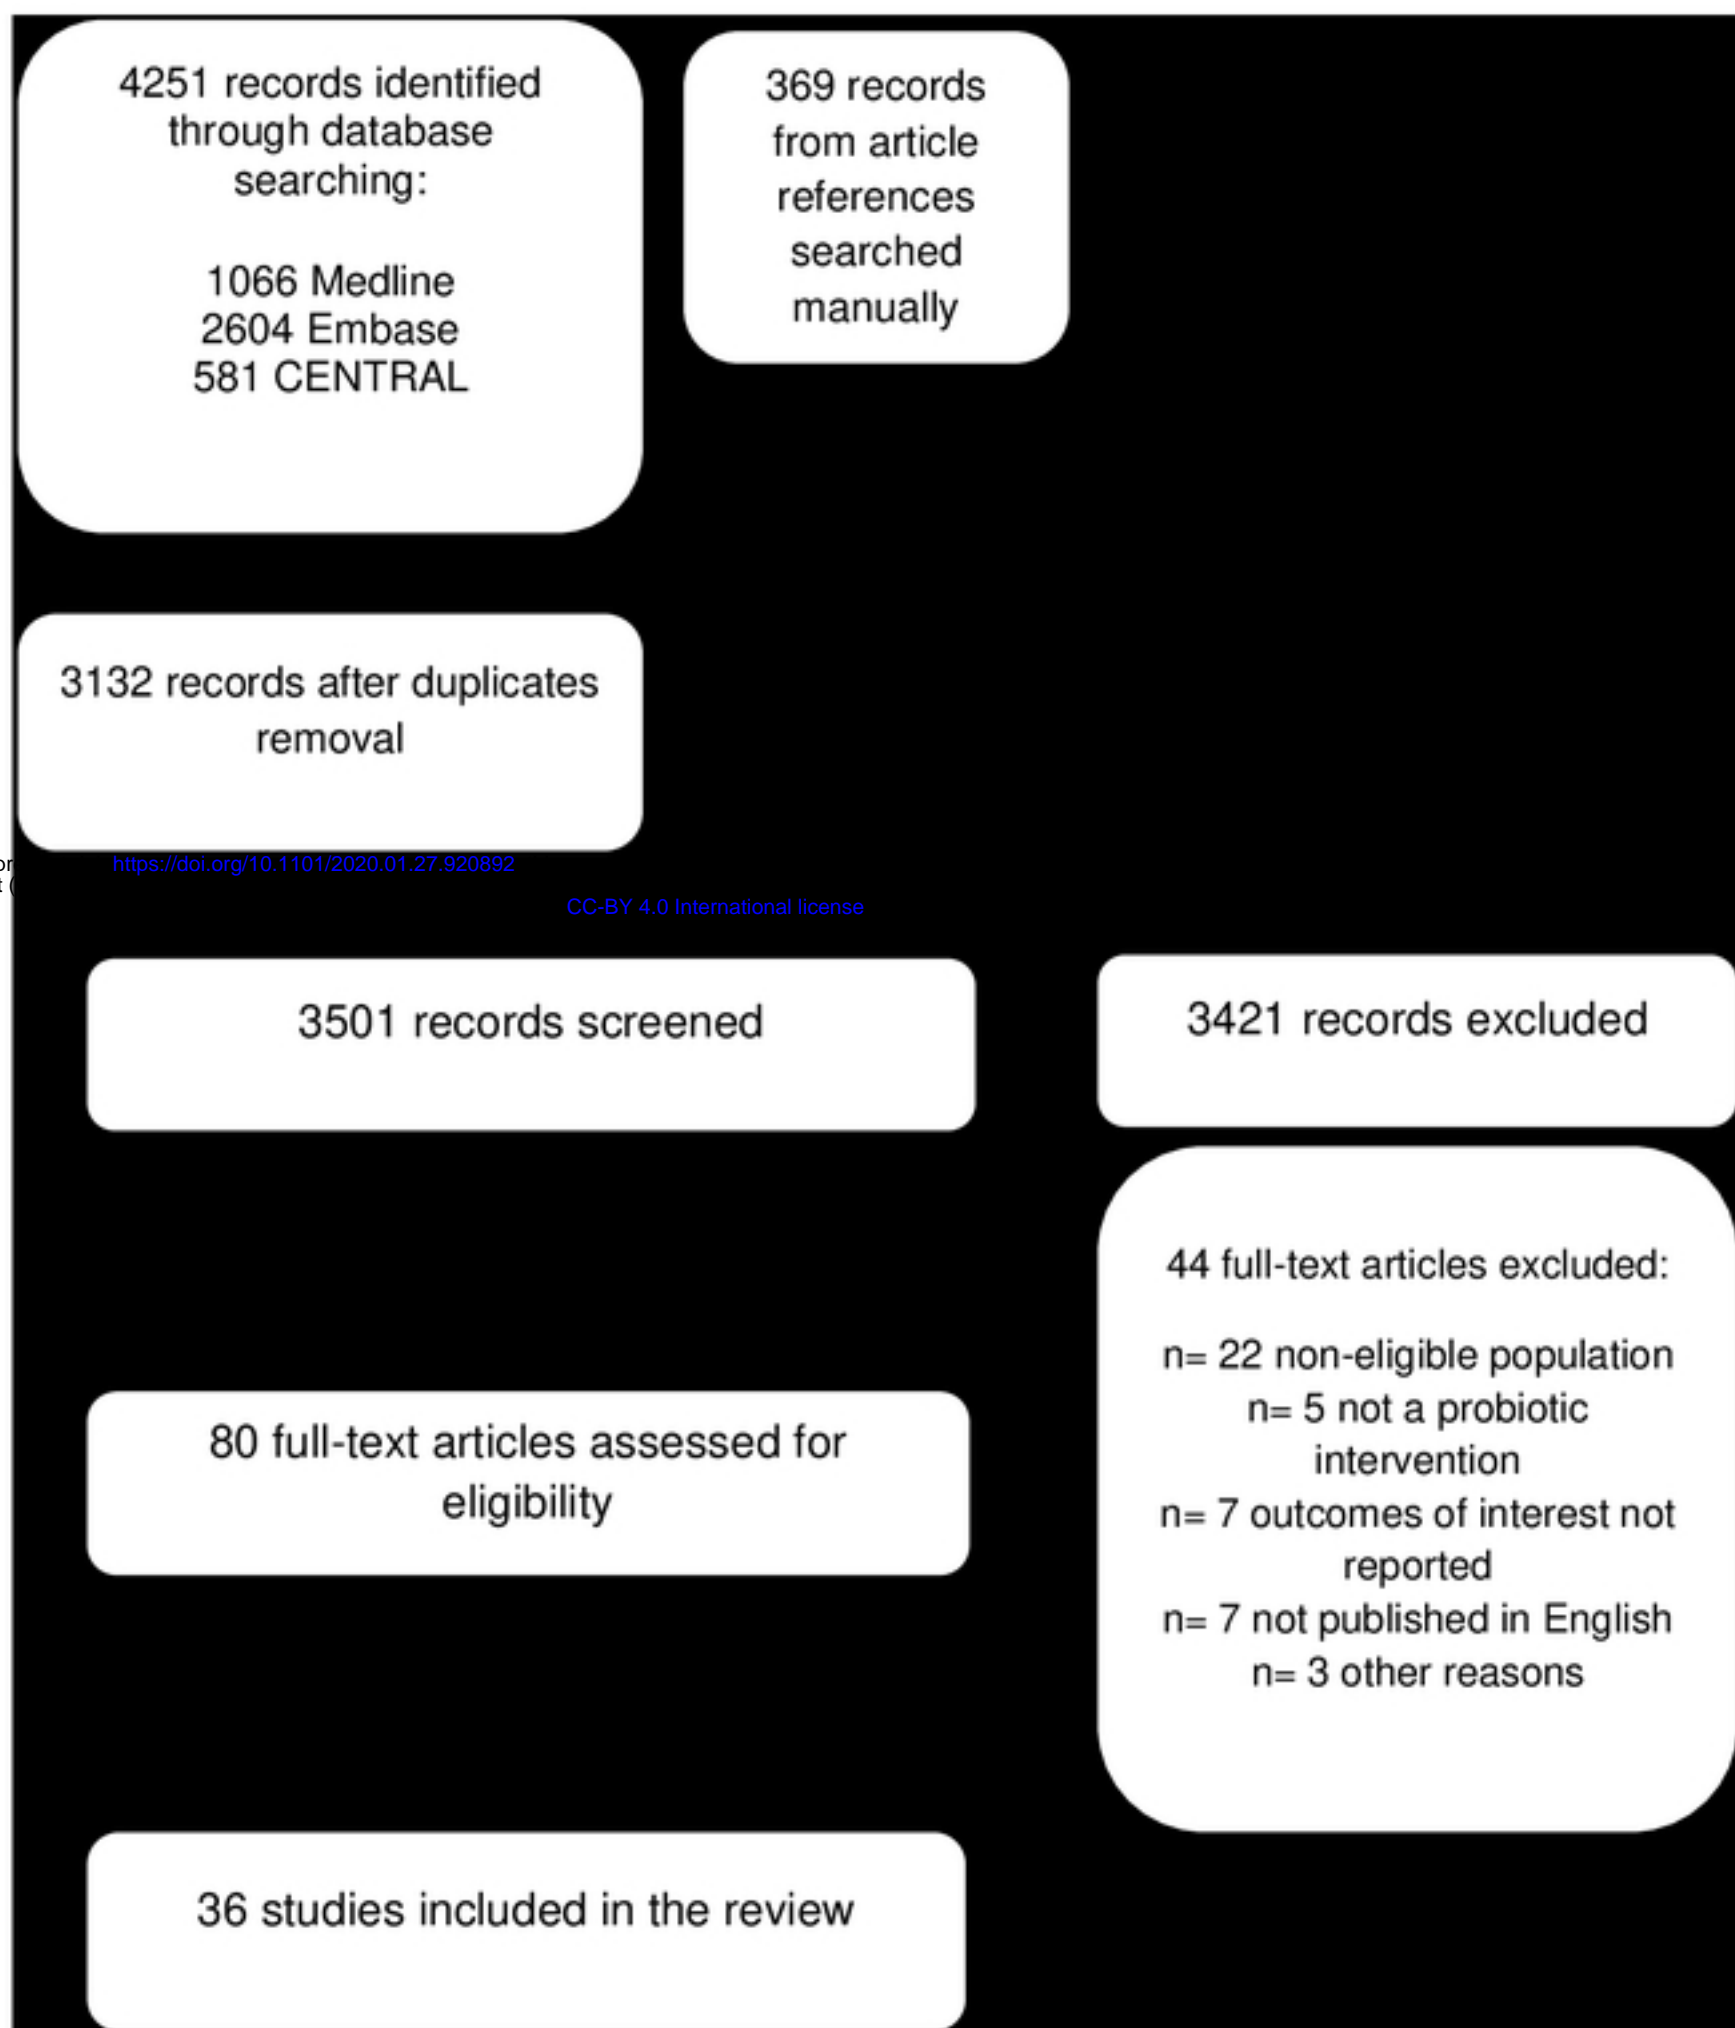

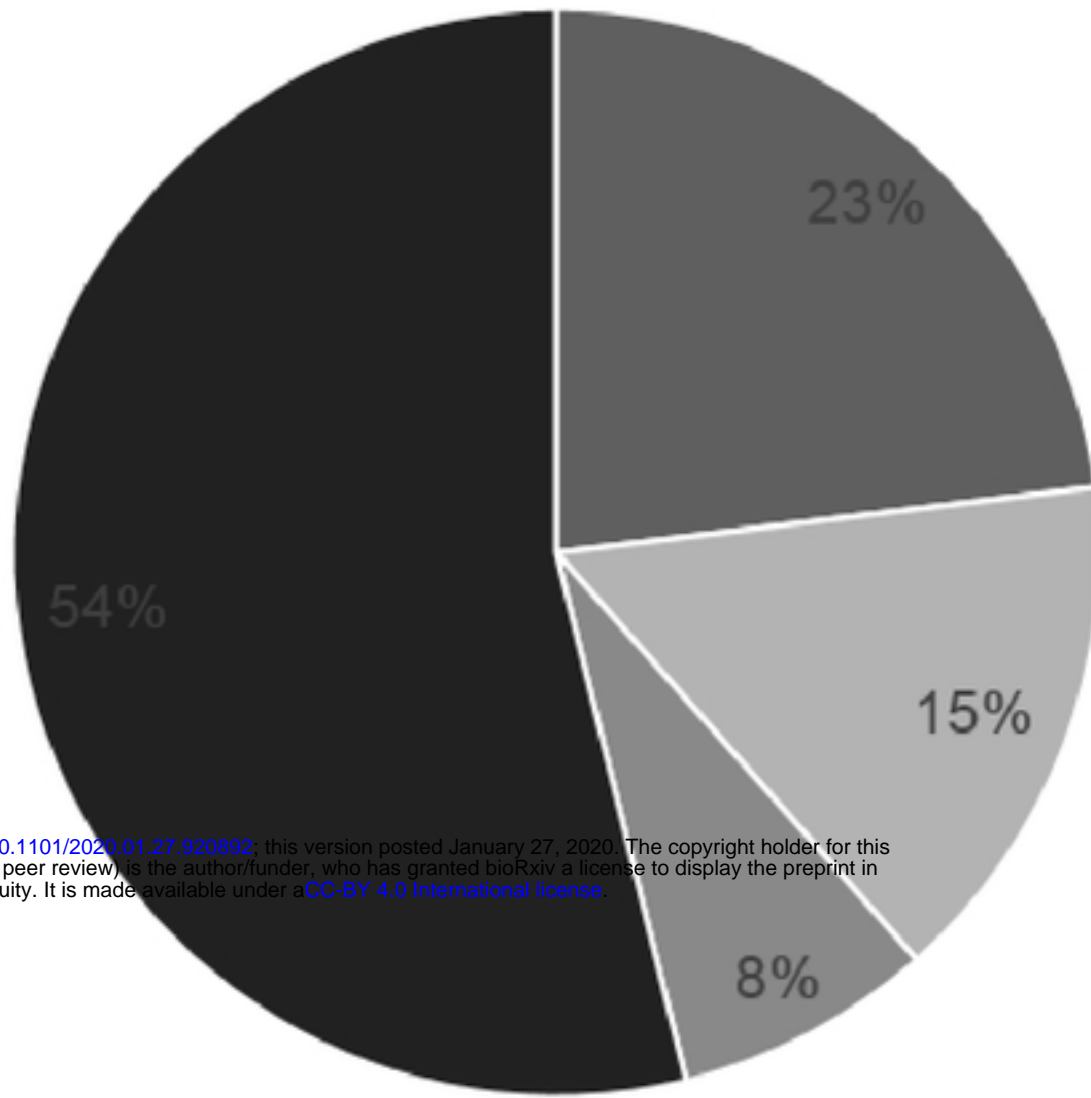

bioRxiv preprint doi: <https://doi.org/10.1101/2020.01.27.920892>; this version posted January 27, 2020. The copyright holder for this preprint (which was not certified by peer review) is the author/funder, who has granted bioRxiv a license to display the preprint in perpetuity. It is made available under aCC-BY 4.0 International license.

- At least 3 watery/loose stools per day for at least 48 hours
- Stool consistency  $\geq 5$  in BSFS and frequency  $\geq 3$ /day for at least 48 hours
- Stool consistency  $\geq 5$  in BSFS and frequency  $\geq 3$ /day for at least 24 hours
- Other definitions, each used only once

Figure 2
